# Supplementary material
Source: PubMed Central journal article supplement (PMC2777674)
Supplement: NIHMS131916-supplement-supplement_1.pdf [file NIHMS131916-supplement-supplement_1.pdf]

Online Table 1: Characteristics of NESARC participants using cannabis 3+ times/week during heaviest period

|                                        | All polydrug cannabis users<br>(N=1,494) | 'Cannabis-only'<br>subset (N=1,119) | Chi-square,<br>df, pvalue |
|----------------------------------------|------------------------------------------|-------------------------------------|---------------------------|
| Demographic characteristics            | % (s.e.)*                                | % (s.e.)*                           |                           |
| <b>Gender</b>                          |                                          |                                     |                           |
| Male                                   | 73.0 (1.3)                               | 58.2 (2.0)                          | 34.1, 1, <0.001           |
| Female                                 | 27.0 (1.3)                               | 41.8 (2.0)                          |                           |
| <b>Race/ethnicity</b>                  |                                          |                                     |                           |
| White                                  | 78.4 (1.4)                               | 71.1 (1.7)                          | 28.0, 4, <0.001           |
| Black                                  | 8.6 (0.8)                                | 15.3 (1.4)                          |                           |
| Hispanic                               | 6.4 (0.8)                                | 8.6 (1.2)                           |                           |
| Asian/Pacific Islander/Native Hawaiian | 2.2 (0.5)                                | 2.3 (0.5)                           |                           |
| Native American/Alaska Native          | 4.3 (0.8)                                | 2.7 (0.7)                           |                           |
| <b>Age</b>                             |                                          |                                     |                           |
| 18 – 29                                | 29.0 (1.5)                               | 37.7 (1.5)                          | 16.1, 3, 0.002            |
| 30 – 44                                | 44.1 (1.5)                               | 37.7 (1.8)                          |                           |

|                                           |            |            |                 |
|-------------------------------------------|------------|------------|-----------------|
| 45 – 64                                   | 26.7 (1.5) | 24.1 (1.5) |                 |
| 65 and older                              | 0.3 (0.1)  | 0.6 (0.2)  |                 |
| <b>Marital status</b>                     |            |            |                 |
| Married/living with someone as if married | 50.8 (1.5) | 51.5 (2.1) |                 |
| Widowed/separated/divorced                | 20.0 (1.2) | 13.9 (1.1) | 16.3, 2, <0.001 |
| Never married                             | 29.2 (1.4) | 34.6 (1.9) |                 |
| <b>Education</b>                          |            |            |                 |
| Less than high school                     | 17.8 (1.2) | 12.0 (1.2) |                 |
| High school                               | 31.6 (1.5) | 29.4 (1.8) | 16.3, 2, <0.001 |
| Some college or higher                    | 50.9 (1.7) | 58.7 (1.9) |                 |
| <b>Personal and family drug history</b>   |            |            |                 |
| <b>Frequency of cannabis use</b>          |            |            |                 |
| 3 – 4 days/week                           | 18.5 (1.2) | 32.5 (1.8) |                 |
| 5 – 6 days/week                           | 18.8 (1.3) | 18.9 (1.4) | 32.5, 2, <0.001 |
| 7 days/week                               | 62.7 (1.5) | 48.6 (2.1) |                 |

**Lifetime DSM-IV cannabis diagnosis**

|                                                                              |            |            |                 |
|------------------------------------------------------------------------------|------------|------------|-----------------|
| Dependence                                                                   | 18.5 (1.2) | 12.9 (1.3) |                 |
| Abuse                                                                        | 58.6 (1.5) | 55.1 (1.7) | 21.1, 1, <0.001 |
| No diagnosis                                                                 | 22.9 (1.3) | 32.0 (1.7) |                 |
| Mean age 1 <sup>st</sup> used cannabis                                       | 16.0 (0.1) | 16.6 (0.1) | -3.1**, 0.003   |
| Mean total years used cannabis                                               | 13.8 (0.2) | 10.8 (0.3) | 9.5**, <0.001   |
| Mean duration (years) of heaviest period of use                              | 6.3 (0.2)  | 3.7 (0.2)  | 7.0**, <0.001   |
| >1 vs. 1 or less mean number of joints per day during period of heaviest use | 74.7 (1.3) | 64.4 (1.8) | 21.1, 1, <0.001 |
| Family history of drug problems (parent or sibling)                          | 35.8 (1.5) | 32.3 (1.8) | 2.4, 1, 0.13    |

**Other DSM-IV primary disorders**

|                                       |            |            |                 |
|---------------------------------------|------------|------------|-----------------|
| Lifetime MDD                          | 20.5 (1.3) | 20.7 (1.4) | 0.0, 1, 0.92    |
| Lifetime panic disorder               | 14.1 (1.1) | 10.5 (1.1) | 6.1, 1, 0.02    |
| Lifetime Generalized Anxiety Disorder | 9.5 (0.8)  | 7.8 (1.1)  | 2.1, 1, 0.16    |
| Any personality disorder              | 45.2 (1.6) | 33.2 (1.8) | 19.2, 1, <0.001 |

---

\* unless indicated that estimate is a mean

\*\* T-test
